# Supplementary material
Source: PubMed Central journal article supplement (PMC1978190)

Supplementary Figure 1

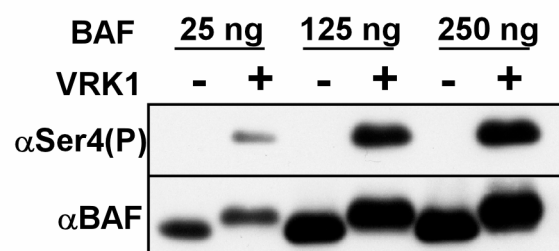

Supplemental Fig 2

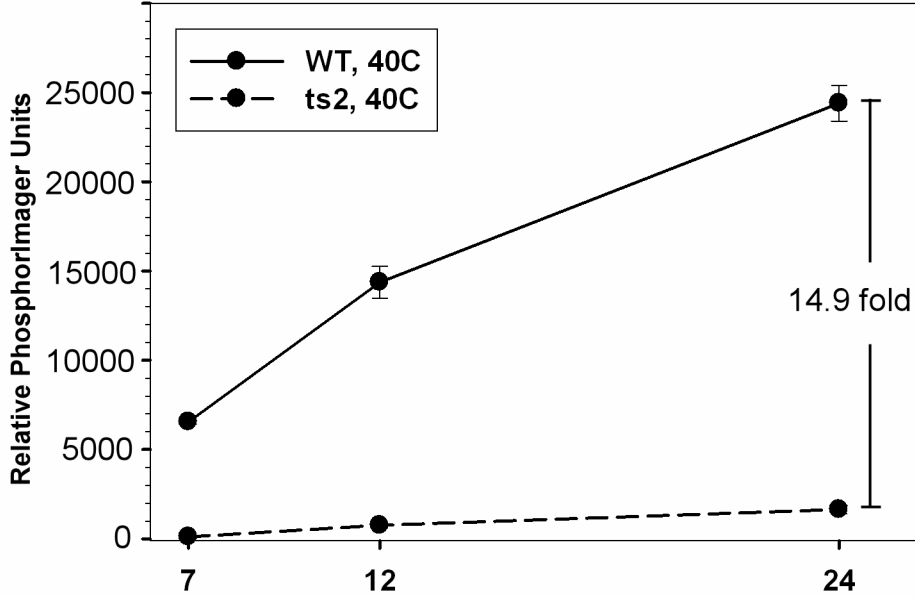

Supplemental Fig 3

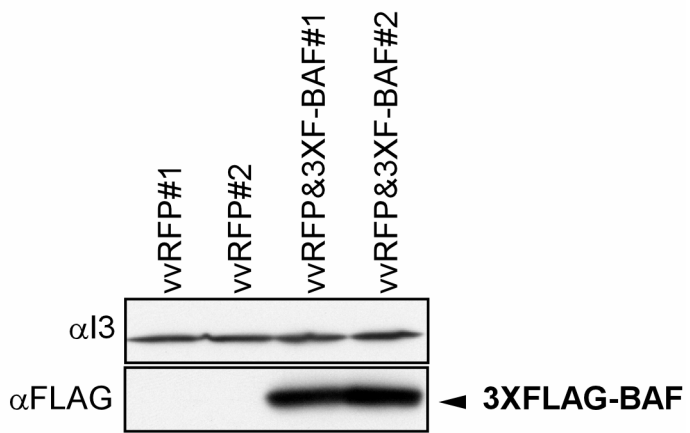

Supplement: NIHMS23961-supplement-01.pdf [file NIHMS23961-supplement-01.pdf]
